# Supplementary material for: Thoracic Tumor Associated with a Unilateral Empyema in a Beef Cow: A Case Report
Source: MDPI journal article supplement (doi:10.3390/vetsci10060376), 2023-05-27
Supplement: s1 [file s1]

**Supplemental Table S1.** Values for biochemical analysis.

| Parameter            | Value | Reference range |
|----------------------|-------|-----------------|
| Fibrinogen (g/L)     | 3.9   | [2 – 7]         |
| Total proteins (g/L) | 84    | [67 – 75]       |
| Albumin (g/L)        | 25    | [28 – 34]       |
| Urea (mmol/L)        | 6.2   | [2.1 – 7.9]     |
| Creatinine (μmol/L)  | 91    | [44 – 97]       |
| ASAT (U/L)           | 97    | [28 – 100]      |
| CK (U/L)             | 127   | [56 – 1,236]    |
| GGT (U/L)            | 58    | [22 – 64]       |
| Bilirubin (μmol/L)   | 3.7   | [2 – 10]        |

ASAT = aspartate aminotransferase; CK = creatine kinase; GGT = gamma-glutamyl transferase; U/L = units per litter.

**Supplemental Table S2.** Values for haematological analysis.

| Parameter                                     | Value       | Reference range |               |
|-----------------------------------------------|-------------|-----------------|---------------|
|                                               |             | Absolute        | Relative      |
| Haematocrit (%)                               | 26.8        | [24 – 39]       |               |
| Haemoglobin (g/L)                             | 89          | [82 – 130]      |               |
| RBC (.10 <sup>12</sup> /L)                    | 6.57        | [4.8 – 7.8]     |               |
| WBC (.10 <sup>9</sup> /L)                     | 9.15        | [4.4 – 10.8]    |               |
| Neutrophil granulocytes (.10 <sup>9</sup> /L) | 5.95 (65 %) | [0.8 – 5]       | [20 % – 40 %] |
| Eosinophil granulocytes (.10 <sup>9</sup> /L) | 0.46 (5 %)  | [0.1 – 2.1]     | [1 % – 15 %]  |
| Basophil granulocytes (.10 <sup>9</sup> /L)   | 0 (0 %)     | [0 – 0.1]       | 0 %           |
| Lymphocytes (.10 <sup>9</sup> /L)             | 2.56 (28 %) | [1.8 – 4.9]     | [40 % – 60 %] |
| Monocytes (.10 <sup>9</sup> /L)               | 0.18 (2 %)  | [0.3 – 1.2]     | [2 % – 10 %]  |
| Platelets (.10 <sup>3</sup> /L)               | 951         | [120 – 600]     |               |

RBC = red blood cells WBC = white blood cells.

**Supplemental Table S3.** Values for the cytological analysis of the intra-thoracic liquid collection.

| Parameter                   | Value |
|-----------------------------|-------|
| Cellularity (/μL)           | 8,820 |
| Neutrophil granulocytes (%) | 89    |
| Macrophages (%)             | 7     |
| Eosinophil granulocytes (%) | 0     |
| Lymphocytes (%)             | 4     |
| Proteins (g/L)              | 55    |

**Supplemental Table S4.** Primary antibodies utilized for immunohistochemistry.

| Antibodies            | Antigenic re-<br>trieval | Dilution | Incubation                   | Reference<br>Company |
|-----------------------|--------------------------|----------|------------------------------|----------------------|
| Vimentin V9           | 30' 96°C Low pH          | 1/50     | 50' at room tempera-<br>ture | M0725, Dako          |
| Desmin D33            | 30' 96°C High pH         | 1/50     | 50' at room tempera-<br>ture | M0760, Dako          |
| Actin HHF35           | None                     | 1/25     | 50' at room tempera-<br>ture | M0635, Dako          |
| Cytokeratin<br>MNf116 | 30' 96°C Low pH          | 1/300    | 50' at room tempera-<br>ture | M0821, Dako          |
